# Supplementary material for: Associations of reproductive factors with incidence of myocardial infarction and ischemic stroke in postmenopausal women: a cohort study
Source: PubMed Central journal article supplement (PMC9942298; doi:10.1186/s12916-023-02757-2), 2023-02-20

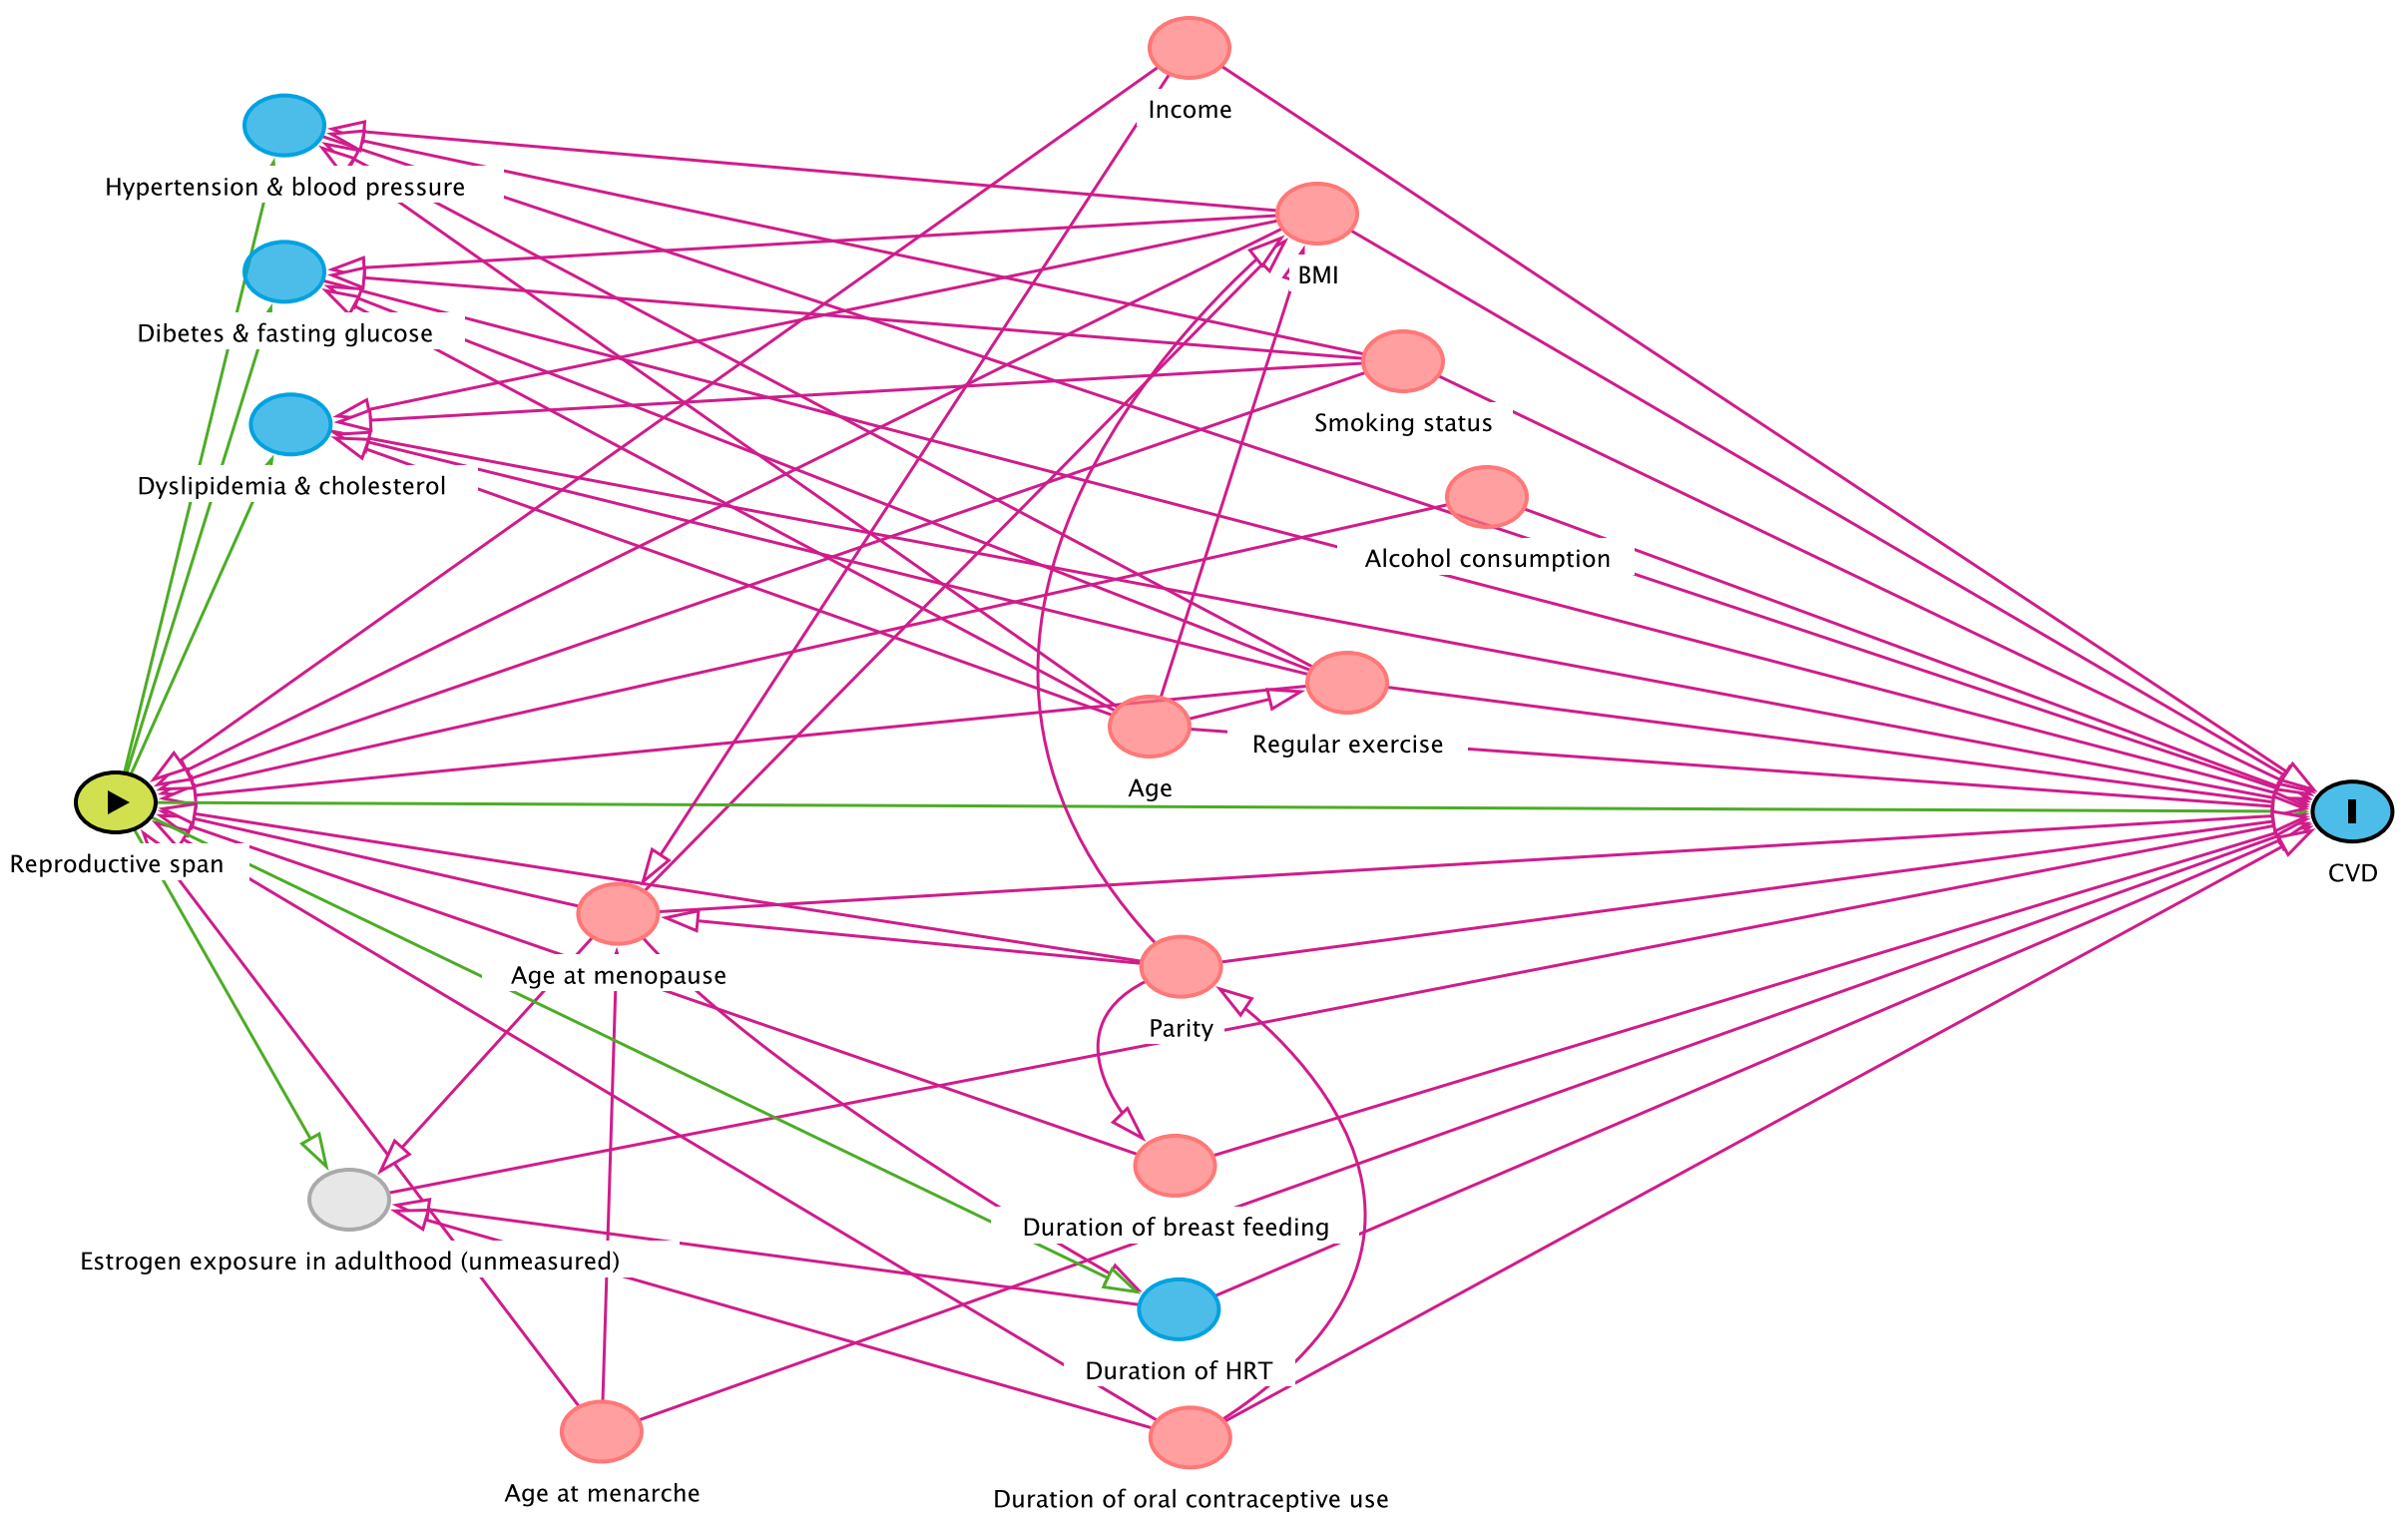

Supplement: 12916_2023_2757_MOESM5_ESM.pdf [file 12916_2023_2757_MOESM5_ESM.pdf]
